# Supplementary material
Source: publisher site journal article supplement (https://www.dovepress.com/article/474907)
Supplement: Supplementary file 1 [file get_supplementary_file.php]

**Supplementary Table 1 Characteristics of older adults with diabetes**

| **Characteristics** | | **Diabetes（n=92）** | **CN（n=63）** | **CI（n=29）** | ***z* /*χ2*** | ***P* value** |
| --- | --- | --- | --- | --- | --- | --- |
| **Sex** | **Males** | 30（32.6） | 23（37.1） | 7（24.1） | 1.383 | 0.240 |
| **Females** | 62（67.4） | 40（62.9） | 22（75.9） |
| **Age (year）** | | 71.00（67.25, 75.00） | 71.00（67.00, 75.00） | 73.00（67.50, 77.00） | -0.876 | 0.381 |
| **Age** | **65~69** | 34（37.0） | 25（39.7） | 9（31.0） | 0.896 | 0.826 |
| **70~74** | 30（32.6） | 20（31.7） | 10（34.5） |
| **75~79** | 21（22.8） | 14（22.2） | 7（24.1） |
| **≥ 80** | 7（7.6） | 4（6.4） | 3（10.4） |
| **Educational level** | **illiteracy** | 19（20.7） | 11（17.4） | 8（27.6） | 10.937 | 0.004 |
| **≤ 6 years** | 22（23.9） | 10（15.9） | 12（41.4） |
| **> 6 years** | 51（55.4） | 42（66.7） | 9（31.0） |
| **Income level** | **< 3000** | 32（34.8） | 19（30.2） | 13（44.8） | 2.102 | 0.551 |
| **3000~** | 47（51.1） | 35（55.5） | 12（41.5） |
| **7000~** | 9（9.8） | 6（9.5） | 3（10.3） |
| **≥ 10000** | 4（4.3） | 3（4.8） | 1（3.4） |
| **BMI (kg/m2)** | | 24.98（23.33, 28.43） | 24.63（23.35, 28.60） | 25.87（23.21, 28.23） | -0.184 | 0.854 |
| **BMI** | **< 18.5** | 2（2.2） | 1（1.6） | 1（3.4） | 1.355 | 0.716 |
| **18.5~23.9** | 32（34.8） | 24（38.1） | 8（27.6） |
| **24.0~27.9** | 34（37.0） | 23（36.5） | 11（37.9） |
| **≥ 28.0** | 24（26.0） | 15（23.8） | 9（31.1） |
| **Physical activity** | **Yes** | 62（67.4） | 42（66.7） | 20（69.0） | 0.048 | 0.827 |
| **No** | 30（32.6） | 21（33.3） | 9（31.0） |
| **Smoking habit** | **Yes** | 16（17.4） | 11（17.5） | 5（17.2） | 0.001 | 0.979 |
| **No** | 76（82.6） | 52（82.5） | 24（82.8） |
| **Alcohol intake** | **Yes** | 6（6.5） | 5（7.9） | 1（3.4） | 0.656 | 0.418 |
| **No** | 86（93.5） | 58（92.1） | 28（96.6） |
| **Tea intake** | **Yes** | 27（29.3） | 20（31.7） | 7（24.1） | 0.554 | 0.457 |
| **No** | 65（70.7） | 43（68.3） | 22（75.9） |
| **Hypertension** | **Yes** | 64（69.6） | 41（65.1） | 23（79.3） | 1.900 | 0.168 |
| **No** | 28（30.4） | 22（34.9） | 6（20.7） |
| **Hyperlipidemia** | **Yes** | 49（53.3） | 37（58.7） | 12（41.4） | 2.402 | 0.121 |
| **No** | 43（46.7） | 26（41.3） | 17（58.6） |
| **IL-1β，ng/ml [M, (P25，P75)]** | | 6.96（6.16, 8.18） | 6.41（6.03, 7.29） | 8.11（7.05, 8.77） | -4.383 | < 0.001 |
| **IL-18，ng/ml [M, (P25，P75)]** | | 242.51（209.24, 276.15） | 222.50（206.37, 259.15） | 255.66（239.73, 322.67） | -3.000 | 0.003 |
| **TNF-α，pg/ml [M, (P25，P75)]** | | 442.20（186.48, 642.41） | 320.50（166.55, 568.25） | 749.92（318.00, 928.36） | -4.021 | < 0.001 |
| **CRP，ng/ml [M, (P25，P75)]** | | 16.10（11.59, 43.94） | 14.55（11.55, 34.07） | 29.55（13.47, 70.18） | -2.580 | 0.010 |

**Supplementary Table 2 Characteristics of older adults with hypertension**

| **Characteristics** | | **Hypertension（n=251）** | **CN（n=145）** | **CI（n=106）** | ***z* /*χ2*** | ***P* value** |
| --- | --- | --- | --- | --- | --- | --- |
| **Sex** | **Males** | 90（35.9） | 54（37.2） | 36（34.0） | 0.286 | 0.593 |
| **Females** | 161（64.1） | 91（62.8） | 70（66.0） |
| **Age (year）** | | 72.00（68.00, 78.00） | 71.00（67.00, 75.00） | 75.00（68.00, 79.00） | -2.908 | 0.004 |
| **Age** | **65~69** | 84（33.5） | 55（37.9） | 29（27.4） | 11.528 | 0.009 |
| **70~74** | 64（25.5） | 43（29.7） | 21（19.8） |
| **75~79** | 65（25.9） | 32（22.1） | 33（31.1） |
| **≥ 80** | 38（15.1） | 15（10.3） | 23（21.7） |
| **Educational level** | **illiteracy** | 58（23.1） | 23（15.9） | 35（33.0） | 20.188 | < 0.001 |
| **≤ 6 years** | 67（26.7） | 32（22.1） | 35（33.0） |
| **> 6 years** | 126（50.2） | 90（62.0） | 36（34.0） |
| **Income level** | **< 3000** | 77（30.6） | 32（22.1） | 45（42.4） | 12.282 | 0.006 |
| **3000~** | 141（56.2） | 93（64.1） | 48（45.3） |
| **7000~** | 18（7.2） | 11（7.6） | 7（6.6） |
| **≥10000** | 15（6.0） | 9（6.2） | 6（5.7） |
| **BMI (kg/m2)** | | 24.61（22.86, 27.34） | 24.56（22.97, 27.34） | 24.77（22.63, 27.48） | -0.226 | 0.821 |
| **BMI** | **< 18.5** | 11（4.4） | 6（4.1） | 5（4.7） | 0.320 | 0.956 |
| **18.5~23.9** | 93（37.1） | 52（35.9） | 41（38.7） |
| **24.0~27.9** | 99（39.4） | 59（40.7） | 40（37.7） |
| **≥ 28.0** | 48（19.1） | 28（19.3） | 20（18.9） |
| **Physical activity** | **Yes** | 168（66.9） | 94（64.8） | 74（69.8） | 0.052 | 0.407 |
| **No** | 83（33.1） | 51（35.2） | 32（30.2） |
| **Smoking habit** | **Yes** | 48（19.1） | 24（16.6） | 24（22.6） | 1.468 | 0.226 |
| **No** | 203（80.9） | 121（83.4） | 82（77.4） |
| **Alcohol intake** | **Yes** | 26（10.4） | 21（14.5） | 5（4.7） | 6.289 | 0.012 |
| **No** | 225（89.6） | 124（85.5） | 101（95.3） |
| **Tea intake** | **Yes** | 57（22.7） | 39（26.9） | 18（17.0） | 3.430 | 0.064 |
| **No** | 194（77.3） | 106（73.1） | 88（83.0） |
| **Diabetes** | **Yes** | 64（25.5） | 41（28.3） | 23（21.7） | 1.395 | 0.238 |
| **No** | 187（74.5） | 104（71.7） | 83（78.3） |
| **Hyperlipidemia** | **Yes** | 85（33.9） | 53（36.6） | 32（30.2） | 0.066 | 0.293 |
| **No** | 166（66.1） | 92（63.4） | 74（69.8） |
| **IL-1β，ng/ml [M, (P25，P75)]** | | 6.81（6.11, 7.55） | 6.63（6.02, 7.34） | 7.00（6.21, 8.01） | -2.647 | 0.008 |
| **IL-18，ng/ml [M, (P25，P75)]** | | 233.59（206.60, 259.23） | 226.15（201.63, 259.36） | 243.47（216.30, 259.17） | -1.696 | 0.090 |
| **TNF-α，pg/ml [M, (P25，P75)]** | | 326.50（184.08, 524.08） | 319.55（167.45, 420.50） | 329.50（218.67, 717.56） | -2.898 | 0.004 |
| **CRP，ng/ml [M, (P25，P75)]** | | 14.55（10.93, 30.73） | 13.52（10.61, 27.05） | 15.83（11.56, 32.39） | -2.343 | 0.019 |

**Supplementary Table 3 Characteristics of older adults with hyperlipidemia**

| **Characteristics** | | **Hyperlipidemia（n=152）** | **CN（n=98）** | **CI（n=54）** | ***z* /*χ2*** | ***P* value** |
| --- | --- | --- | --- | --- | --- | --- |
| **Sex** | **Males** | 53（34.9） | 37（37.8） | 16（29.6） | 1.012 | 0.314 |
| **Females** | 99（65.1） | 61（62.2） | 38（70.4） |
| **Age (year）** | | 71.00（67.00, 76.00） | 70.00（67.00, 74.00） | 74.50（67.00, 79.00） | -2.870 | 0.004 |
| **Age** | **65~69** | 59（38.8） | 42（42.9） | 17（31.5） | 12.938 | 0.005 |
| **70~74** | 43（28.3） | 33（33.7） | 10（18.5） |
| **75~79** | 35（23.0） | 18（18.4） | 17（31.5） |
| **≥ 80** | 15（9.9） | 5（5.0） | 10（18.5） |
| **Educational level** | **illiteracy** | 25（16.4） | 10（10.2） | 15（27.8） | 15.987 | < 0.001 |
| **≤ 6 years** | 36（23.7） | 18（18.4） | 18（33.3） |
| **> 6 years** | 91（59.9） | 70（71.4） | 21（38.9） |
| **Income level** | **< 3000** | 49（32.2） | 27（27.6） | 22（40.7） | 2.931 | 0.402 |
| **3000~** | 85（55.9） | 59（60.2） | 26（48.1） |
| **7000~** | 10（6.6） | 7（7.1） | 3（5.6） |
| **≥ 10000** | 8（5.3） | 5（5.1） | 3（5.6） |
| **BMI (kg/m2)** | | 24.87（23.34, 27.28） | 25.06（23.44, 27.56） | 24.44（22.18, 27.06） | -1.192 | 0.233 |
| **BMI** | **< 18.5** | 4（2.6） | 2（2.0） | 2（3.7） | 2.696 | 0.441 |
| **18.5~23.9** | 48（31.6） | 27（27.6） | 21（38.9） |
| **24.0~27.9** | 70（46.1） | 48（49.0） | 22（40.7） |
| **≥ 28.0** | 30（19.7） | 21（21.4） | 9（16.7） |
| **Physical activity** | **Yes** | 113（74.3） | 74（75.5） | 39（72.2） | 0.197 | 0.657 |
| **No** | 39（25.7） | 24（24.5） | 15（27.8） |
| **Smoking habit** | **Yes** | 29（19.1） | 16（16.3） | 13（24.1） | 1.354 | 0.245 |
| **No** | 123（80.9） | 82（83.7） | 41（75.9） |
| **Alcohol intake** | **Yes** | 15（9.9） | 12（12.2） | 3（5.6） | 1.752 | 0.186 |
| **No** | 137（90.1） | 86（87.8） | 51（94.4） |
| **Tea intake** | **Yes** | 41（27.0） | 29（29.6） | 12（22.2） | 0.960 | 0.327 |
| **No** | 111（73.0） | 69（70.4） | 42（77.8） |
| **Diabetes** | **Yes** | 49（32.2） | 37（37.8） | 12（22.2） | 3.845 | 0.050 |
| **No** | 103（67.8） | 61（62.2） | 42（77.8） |
| **Hypertension** | **Yes** | 85（55.9） | 53（54.1） | 32（59.3） | 0.379 | 0.538 |
| **No** | 67（44.1） | 45（45.9） | 22（40.7） |
| **IL-1β，ng/ml [M, (P25，P75)]** | | 6.62（5.98, 7.62） | 6.45（5.96, 7.30） | 7.24（6.21, 8.04） | -2.381 | 0.017 |
| **IL-18，ng/ml [M, (P25，P75)]** | | 229.19（206.72, 262.82） | 222.10（201.78, 253.08） | 248.71（212.03, 290.99） | -2.612 | 0.009 |
| **TNF-α，pg/ml [M, (P25，P75)]** | | 326.96（194.76, 567.25） | 278.50（184.59, 422.23） | 570.47（221.42 764.27） | -4.037 | < 0.001 |
| **CRP，ng/ml [M, (P25，P75)]** | | 14.71（10.92, 33.78） | 13.86（10.63, 23.28） | 22.05（11.53, 50.39） | -2.458 | 0.014 |

**Supplementary Table 4 Characteristics of older adults with multimorbidity**

| **Characteristics** | | **Multimorbidity（n=126）** | **CN（n=81）** | **CI（n=45）** | ***z* /*χ2*** | ***P* value** |
| --- | --- | --- | --- | --- | --- | --- |
| **Sex** | **Males** | 41（32.5） | 30（37.0） | 11（24.4） | 2.090 | 0.148 |
| **Females** | 85（67.5） | 51（63.0） | 34（75.6） |
| **Age (year）** | | 71.00（67.00, 75.25） | 70.00（67.00, 75.00） | 73.00（67.50, 78.00） | -1.767 | 0.077 |
| **Age** | **65~69** | 50（39.7） | 35（43.2） | 15（33.4） | 5.202 | 0.158 |
| **70~74** | 36（28.6） | 25（30.8） | 11（24.4） |
| **75~79** | 27（21.4） | 16（19.8） | 11（24.4） |
| **≥ 80** | 13（10.3） | 5（6.2） | 8（17.8） |
| **Educational level** | **illiteracy** | 24（19.0） | 12（14.8） | 12（26.7） | 13.578 | 0.001 |
| **≤ 6 years** | 30（23.8） | 13（16.0） | 17（37.8） |
| **> 6 years** | 72（57.2） | 56（69.2） | 16（35.5） |
| **Income level** | **< 3000** | 43（34.1） | 22（27.1） | 21（46.6） | 5.307 | 0.151 |
| **3000~** | 66（52.4） | 48（59.3） | 18（40.0） |
| **7000~** | 9（7.1） | 6（7.4） | 3（6.7） |
| **≥ 10000** | 8（6.4） | 5（6.2） | 3（6.7） |
| **BMI (kg/m2)** | | 24.97（23.38, 27.82） | 24.65（23.44, 27.78） | 25.62（23.00, 28.10） | -0.015 | 0.988 |
| **BMI** | **< 18.5** | 4（3.2） | 2（2.5） | 2（4.4） | 2.157 | 0.540 |
| **18.5~23.9** | 39（31.0） | 24（29.6） | 15（33.4） |
| **24.0~27.9** | 55（43.6） | 39（48.1） | 16（35.5） |
| **≥ 28.0** | 28（22.2） | 16（19.8） | 12（26.7） |
| **Physical activity** | **Yes** | 86（68.3） | 53（65.4） | 33（73.3） | 0.833 | 0.361 |
| **No** | 40（31.7） | 28（34.6） | 12（26.7） |
| **Smoking habit** | **Yes** | 21（16.7） | 12（14.8） | 9（20.0） | 0.560 | 0.454 |
| **No** | 105（83.3） | 69（85.2） | 36（80.0） |
| **Alcohol intake** | **Yes** | 11（8.7） | 10（12.3） | 1（2.2） | 3.721 | 0.054 |
| **No** | 115（91.3） | 71（87.7） | 44（97.8） |
| **Tea intake** | **Yes** | 34（27.0） | 22（27.2） | 12（26.7） | 0.004 | 0.952 |
| **No** | 92（73.0） | 59（72.8） | 33（73.3） |
| **IL-1β，ng/ml [M, (P25，P75)]** | | 6.93（6.21, 7.95） | 6.47（6.02, 7.30） | 7.59（6.81, 8.72） | -4.277 | < 0.001 |
| **IL-18，ng/ml [M, (P25，P75)]** | | 237.80（207.32, 263.20） | 222.50（203.91, 258.36） | 249.92（227.79, 291.10） | -2.935 | 0.003 |
| **TNF-α，pg/ml [M, (P25，P75)]** | | 412.50（220.17, 631.56） | 338.50（166.52, 523.91） | 644.27（279.96, 882.45） | -4.198 | < 0.001 |
| **CRP，ng/ml [M, (P25，P75)]** | | 15.89（11.55, 39.67） | 14.34（11.08, 30.28） | 23.63（11.70, 70.24） | -2.556 | 0.011 |
